# Supplementary material for: The CDK12 inhibitor SR-4835 functions as a molecular glue that promotes cyclin K degradation in melanoma
Source: PubMed Central journal article supplement (PMC10725499; doi:10.1038/s41420-023-01754-x), 2023-12-16
Supplement: 41420_2023_1754_MOESM1_ESM.pdf [file 41420_2023_1754_MOESM1_ESM.pdf]

## Supporting information

# The CDK12 inhibitor SR-4835 functions as a molecular glue that promotes cyclin K degradation in melanoma

**Thibault Houles,<sup>1,7,\*</sup> Jonathan Boucher,<sup>1,7</sup> Geneviève Lavoie,<sup>1</sup> Graham MacLeod,<sup>2</sup> Sichun Lin,<sup>2</sup> Stephane Angers,<sup>2,3,4</sup> Philippe P. Roux<sup>1,4,5,6,\*</sup>**

<sup>1</sup>Institute for Research in Immunology and Cancer (IRIC), Université de Montréal, Montreal, 2950, Chemin de la Polytechnique, Montréal, QC, H3T 1J4, Canada.

<sup>2</sup>Donnelly Centre for Cellular & Biomolecular Research, Temerty Faculty of Medicine, University of Toronto, Toronto, ON, Canada.

<sup>3</sup>Leslie Dan Faculty of Pharmacy, University of Toronto, Toronto, Canada.

<sup>4</sup>Department of Biochemistry, Temerty Faculty of Medicine, University of Toronto, Toronto, ON, Canada.

<sup>4</sup>Department of Pathology and Cell Biology, Faculty of Medicine, Université de Montréal, Montreal, Quebec, Canada.

<sup>5</sup>Senior author

<sup>6</sup>Lead contact

<sup>7</sup>These authors contributed equally.

\*Correspondence: philippe.roux@umontreal.ca (P.P.R.) or thibault.houles@igmm.cnrs.fr (T.H.)

Running title: SR-4835 promotes cyclin K degradation

## Table of contents

|                                                     |    |
|-----------------------------------------------------|----|
| Figure S1. Summary and HPLC spectrum of SR-4835     | 3  |
| Figure S2. LC-MS analysis of SR-4835                | 4  |
| Figure S3. Summary and HPLC spectrum of CU-0904     | 5  |
| Figure S4. LC-MS analysis of CU-0904                | 6  |
| Figure S5. <sup>1</sup> H NMR spectrum of CU-0904   | 7  |
| Figure S6. <sup>19</sup> F NMR spectrum of CU-0904  | 8  |
| Figure S7. Summary and HPLC spectrum of CU-0905     | 9  |
| Figure S8. LC-MS analysis of CU-0905                | 10 |
| Figure S9. <sup>1</sup> H NMR spectrum of CU-0905   | 11 |
| Figure S10. <sup>19</sup> F NMR spectrum of CU-0905 | 12 |
| Figure S11. Summary and HPLC spectrum of CU-0906    | 13 |
| Figure S12. LC-MS analysis of CU-0906               | 14 |
| Figure S13. <sup>1</sup> H NMR spectrum of CU-0906  | 15 |

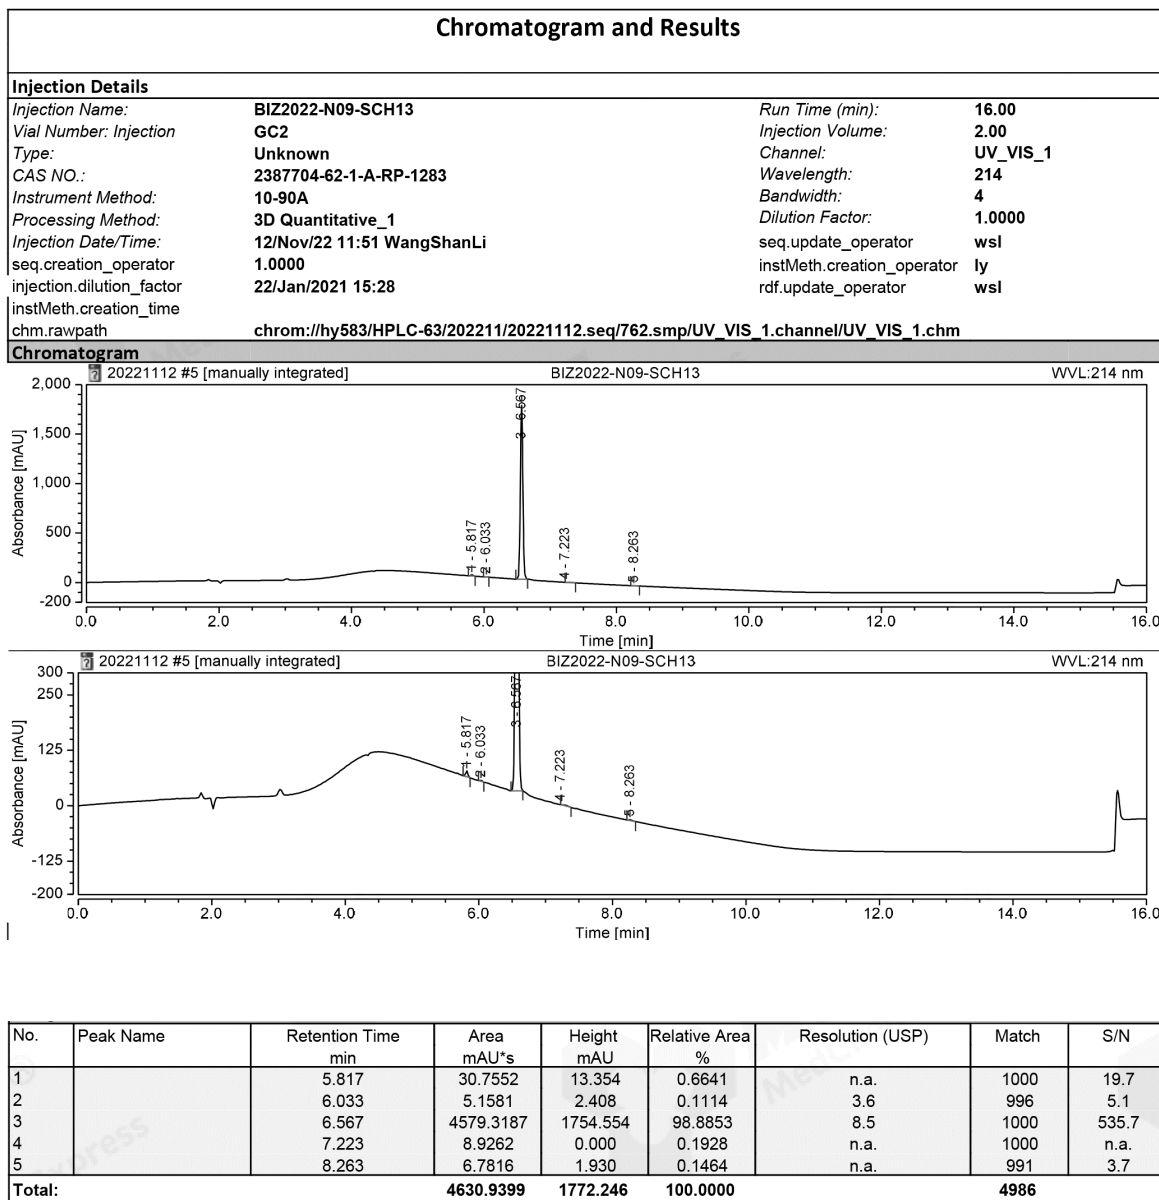

Figure S1. Summary and HPLC spectrum of SR-4835

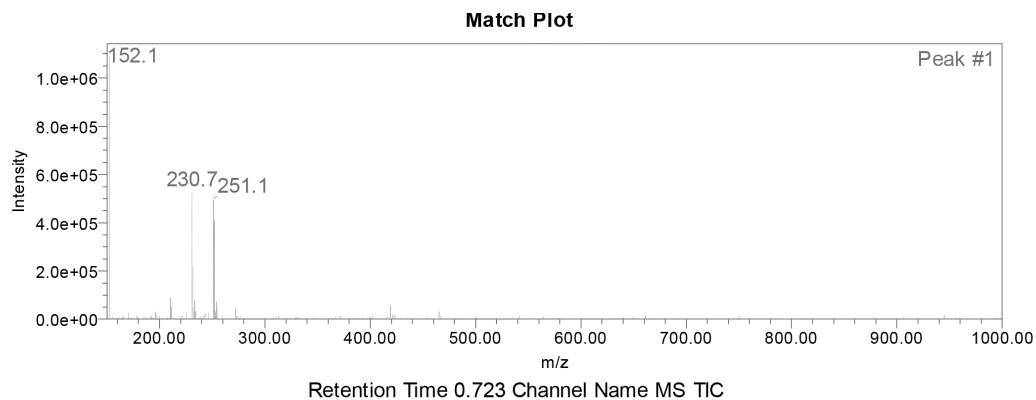

**Peak Results**  
Channel Name: MS TIC

|   | RT    | Width (sec) | Area      | Height   | % Area | Base Peak (Combined) (m/z) | Channel Name |
|---|-------|-------------|-----------|----------|--------|----------------------------|--------------|
| 1 | 0.723 | 2.611       | 6081839   | 3111997  | 2.42   | 150.93                     | MS TIC       |
| 2 | 0.854 | 5.803       | 198213859 | 90662977 | 78.90  | 270.65                     | MS TIC       |
| 3 | 0.992 | 4.933       | 46914129  | 17460069 | 18.68  | 152.02                     | MS TIC       |

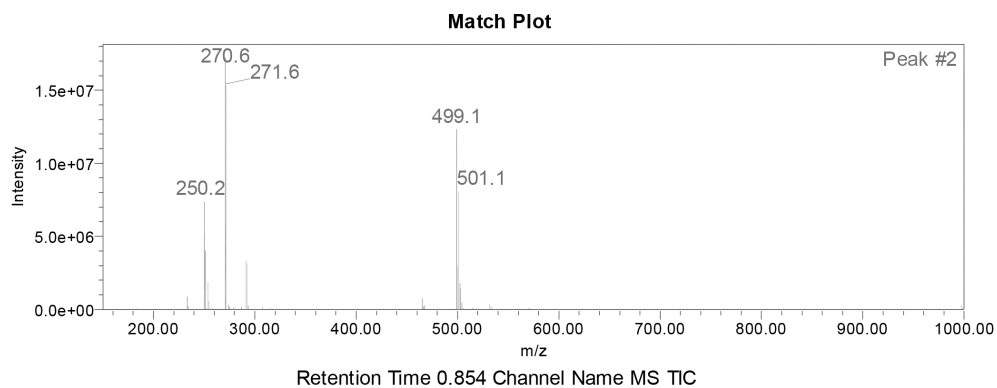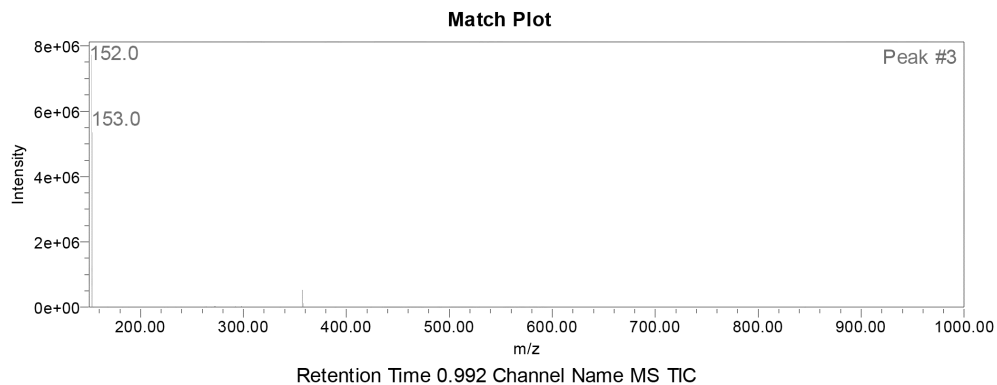

Figure S2. LC-MS analysis of SR-4835

| Description      |                                                                                                                                                    |
|------------------|----------------------------------------------------------------------------------------------------------------------------------------------------|
| Name             | 9 <i>H</i> -Purin-6-amine, <i>N</i> -[(5,6-difluoro-1 <i>H</i> -benzimidazol-2-yl)methyl]-9-(1-methyl-1 <i>H</i> -pyrazol-4-yl)-2-(4-morpholinyl)- |
| OmegaChem #      | CU-0904                                                                                                                                            |
| Lot #            | 01MD519-329-02                                                                                                                                     |
| CAS #            | 2387704-56-3                                                                                                                                       |
| Chemical Formula | C <sub>21</sub> H <sub>20</sub> F <sub>2</sub> N <sub>10</sub> O                                                                                   |
| Molecular Weight | 466.45                                                                                                                                             |
| Campaign         | C0737-0904-01-21                                                                                                                                   |

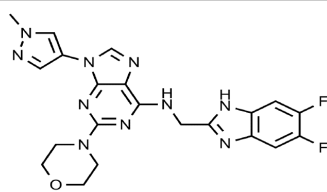

| Analysis            |                            |                                                         |
|---------------------|----------------------------|---------------------------------------------------------|
| Tests               | Specifications             | Results                                                 |
| Appearance          | White to Pale Yellow Solid | Off-white solid                                         |
| Chemical Purity     | 95% minimum (HPLC)         | 99.8 % (average $\lambda = 215$ and $\lambda = 254$ nm) |
| Mass Spectroscopy   | Must comply to Structure   | [M+H] <sup>+</sup> = 467.2                              |
| <sup>1</sup> H NMR  | Must comply to Structure   | Comforms (DMSO- <i>d</i> <sub>6</sub> )                 |
| <sup>19</sup> F NMR | Must comply to Structure   | Comforms (DMSO- <i>d</i> <sub>6</sub> )                 |

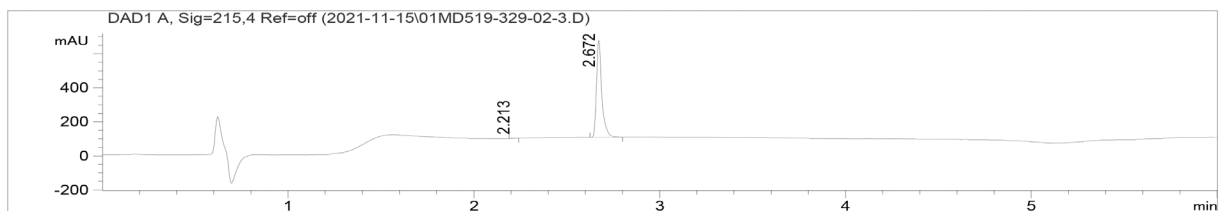

| # | Meas. Ret. | Ti      | Height  | Height % | Area     | Area % |
|---|------------|---------|---------|----------|----------|--------|
| 1 | 2.213      | 2.708   | 0.473   | 0.473    | 4.025    | 0.356  |
| 2 | 2.672      | 569.482 | 569.482 | 99.527   | 1126.317 | 99.644 |

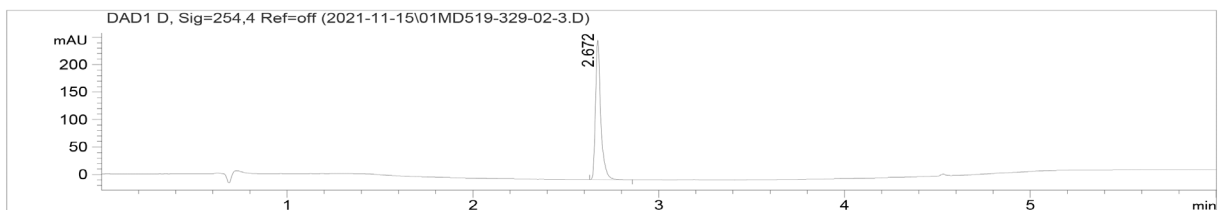

| # | Meas. Ret. | Ti      | Height  | Height % | Area    | Area %  |
|---|------------|---------|---------|----------|---------|---------|
| 1 | 2.672      | 253.886 | 253.886 | 100.000  | 501.344 | 100.000 |

Figure S3. Summary and HPLC spectrum of CU-0904

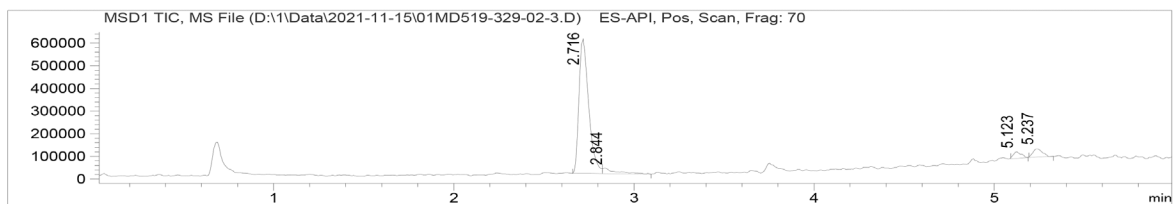

| # | Meas. Ret. Ti | Height     | Height % | Area        | Area % |
|---|---------------|------------|----------|-------------|--------|
| 1 | 2.716         | 596249.063 | 86.359   | 2224277.250 | 86.364 |
| 2 | 2.844         | 24802.652  | 3.592    | 129612.992  | 5.033  |
| 3 | 5.123         | 30769.904  | 4.457    | 89153.016   | 3.462  |
| 4 | 5.237         | 38605.496  | 5.592    | 132416.359  | 5.141  |

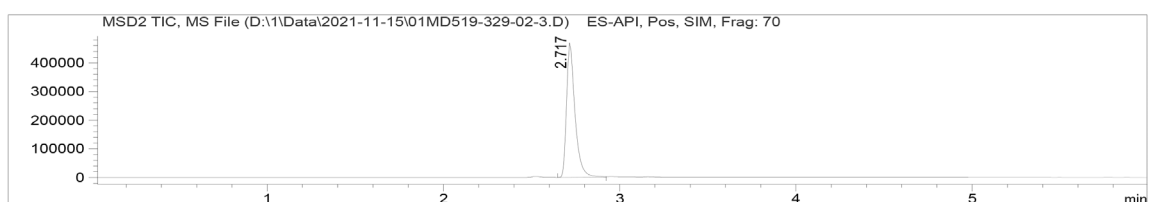

| # | Meas. Ret. Ti | Height     | Height % | Area        | Area %  |
|---|---------------|------------|----------|-------------|---------|
| 1 | 2.717         | 472104.781 | 100.000  | 1567202.875 | 100.000 |

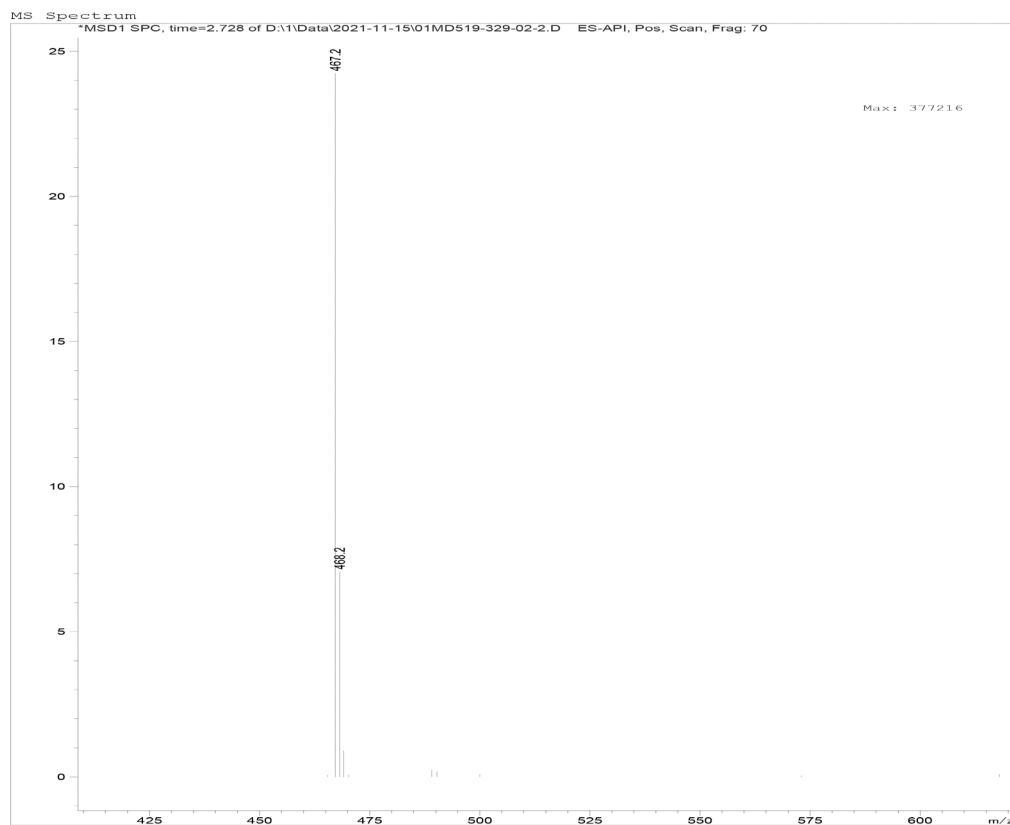

Figure S4. LC-MS analysis of CU-0904

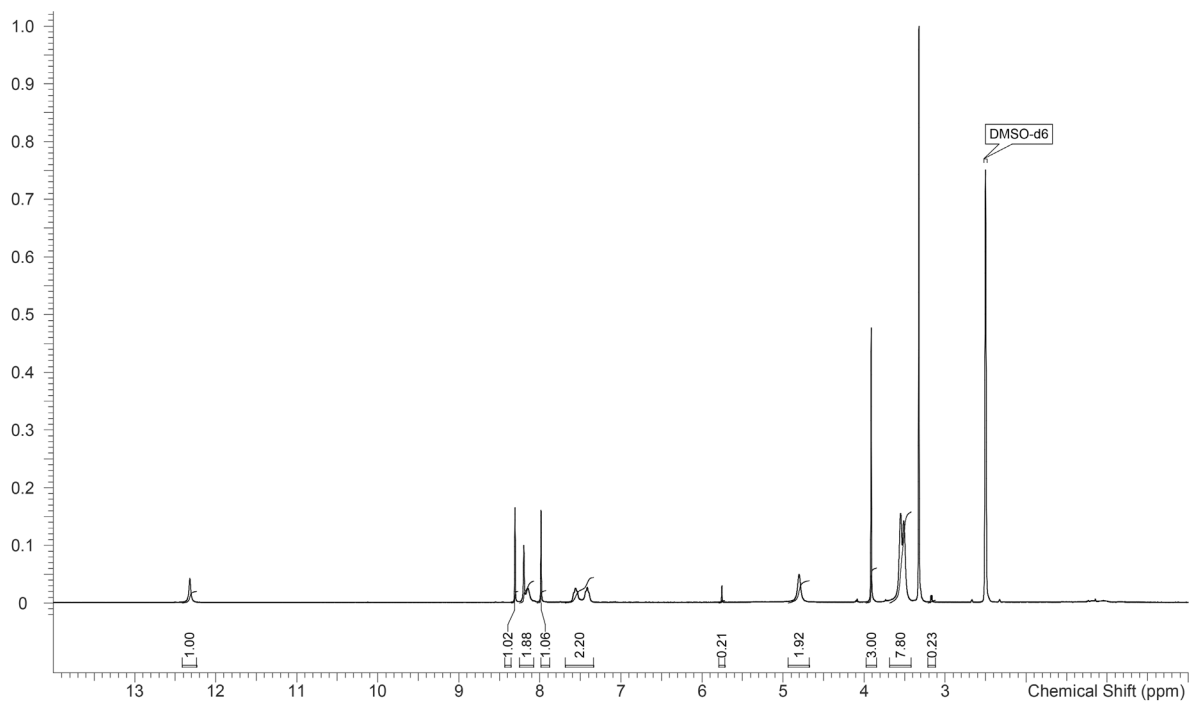

$^1\text{H}$  NMR (400 MHz,  $\text{DMSO-d}_6$ )  $\delta$  ppm 3.42 - 3.68 (m, 8 H), 3.91 (s, 3 H), 4.80 (br s, 2 H), 7.34 - 7.69 (m, 2 H), 7.99 (s, 1 H), 8.07 - 8.25 (m, 2 H), 8.31 (s, 1 H), 12.32 (br s, 1 H).

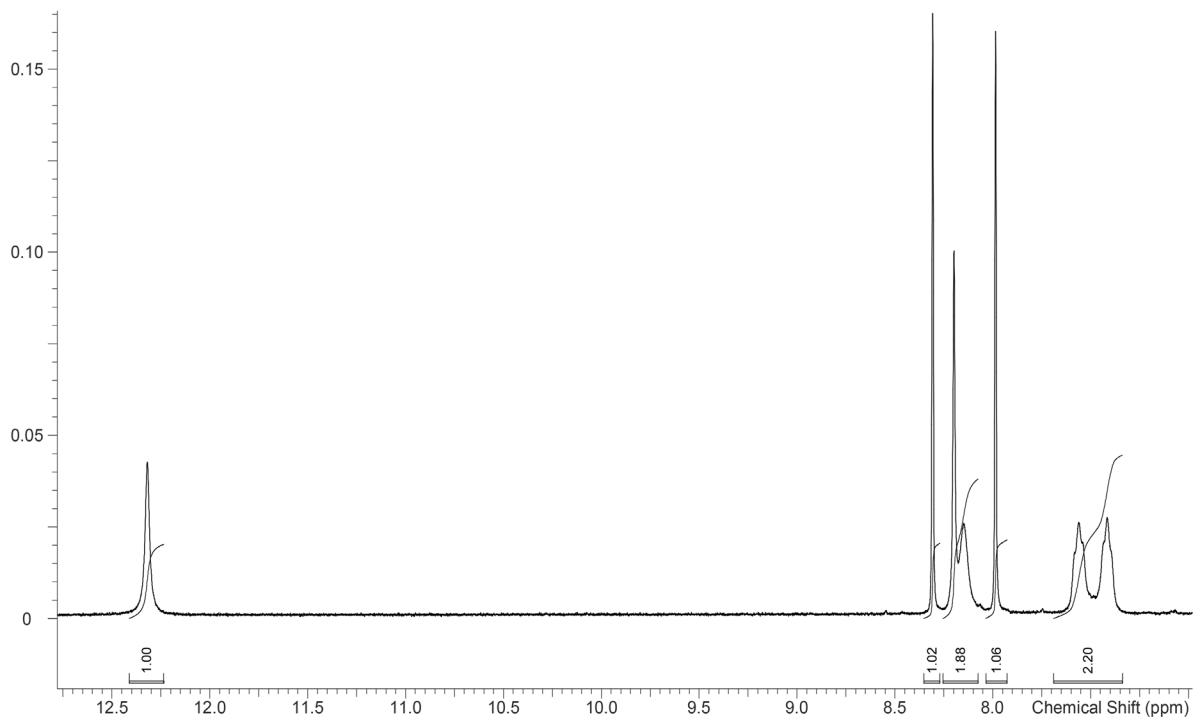

$^1\text{H}$  NMR (400 MHz,  $\text{DMSO-d}_6$ )  $\delta$  ppm 3.42 - 3.68 (m, 8 H), 3.91 (s, 3 H), 4.80 (br s, 2 H), 7.34 - 7.69 (m, 2 H), 7.99 (s, 1 H), 8.07 - 8.25 (m, 2 H), 8.31 (s, 1 H), 12.32 (br s, 1 H).

Figure S5.  $^1\text{H}$  NMR spectrum of CU-0904

Houles et al.

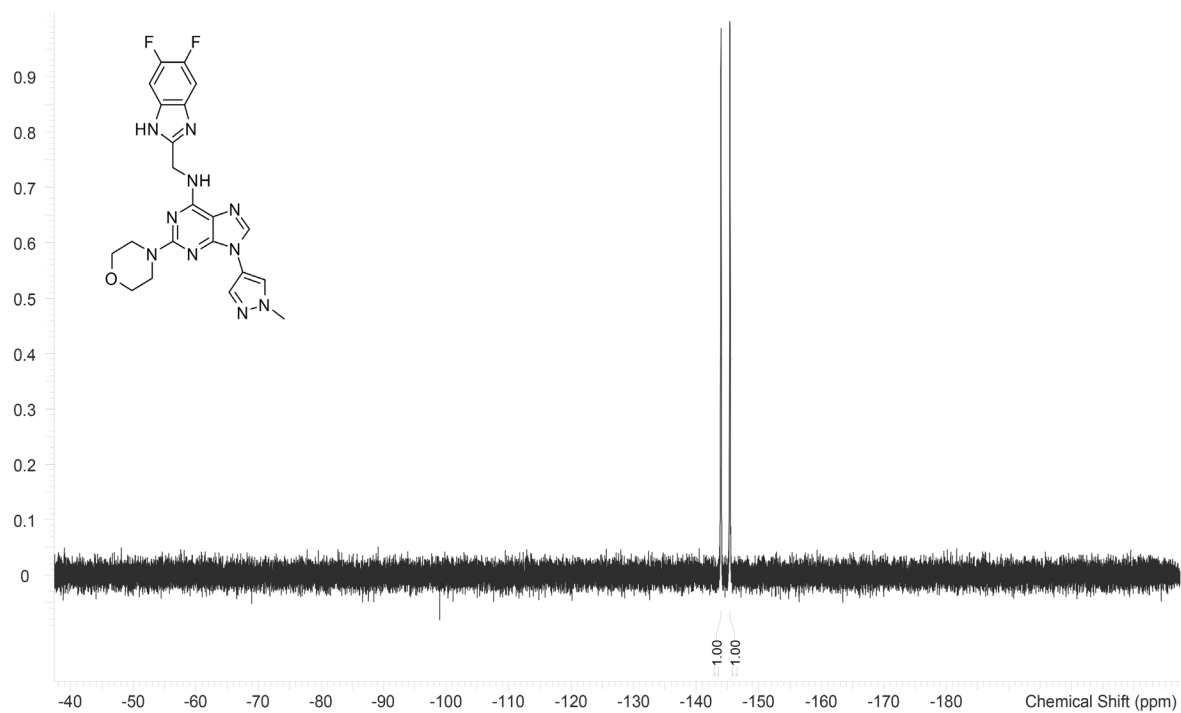

<sup>19</sup>F NMR (377 MHz, DMSO-d<sub>6</sub>) δ ppm -146.38 (br. s, 1 F), -144.97 (br. s, 1 F).

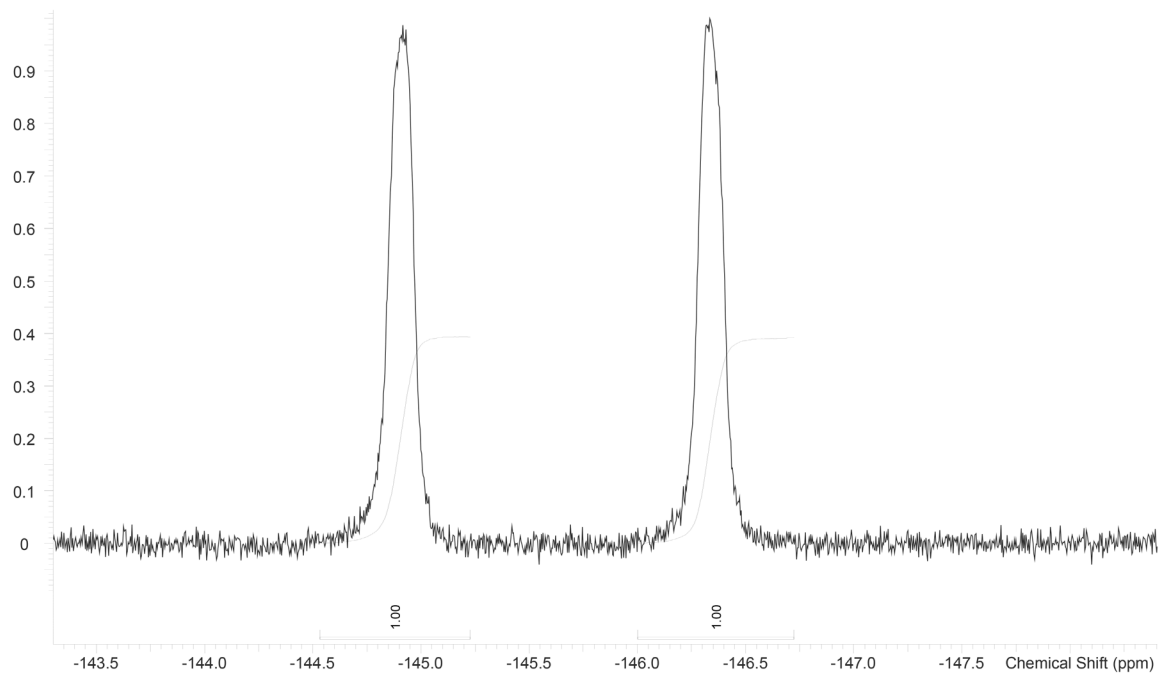

<sup>19</sup>F NMR (377 MHz, DMSO-d<sub>6</sub>) δ ppm -146.38 (br. s, 1 F), -144.97 (br. s, 1 F).

Figure S6. <sup>19</sup>F NMR spectrum of CU-0904



| Description      |                                                                                                                 |
|------------------|-----------------------------------------------------------------------------------------------------------------|
| Name             | 9H-Purin-6-amine, N-[(6,7-difluoro-1H-benzimidazol-2-yl)methyl]-9-(1-methyl-1H-pyrazol-4-yl)-2-(4-morpholinyl)- |
| OmegaChem #      | CU-0905                                                                                                         |
| Lot #            | 01MD519-328-03                                                                                                  |
| CAS #            | 2387704-54-1                                                                                                    |
| Chemical Formula | C <sub>21</sub> H <sub>20</sub> F <sub>2</sub> N <sub>10</sub> O                                                |
| Molecular Weight | 466.45                                                                                                          |
| Campaign         | C0738-0905-01-21                                                                                                |

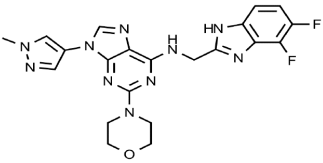

| Analysis            |                            |                                                  |
|---------------------|----------------------------|--------------------------------------------------|
| Tests               | Specifications             | Results                                          |
| Appearance          | White to Pale Yellow Solid | Off-white solid                                  |
| Chemical Purity     | 95% minimum (HPLC)         | 97.8% (HPLC, average $\lambda$ = 215 and 254 nm) |
| Mass Spectroscopy   | Must comply to Structure   | [M+H] <sup>+</sup> = 467.2                       |
| <sup>1</sup> H NMR  | Must comply to Structure   | Conforms (CD <sub>3</sub> OD)                    |
| <sup>19</sup> F NMR | Must comply to Structure   | Conforms (CD <sub>3</sub> OD)                    |

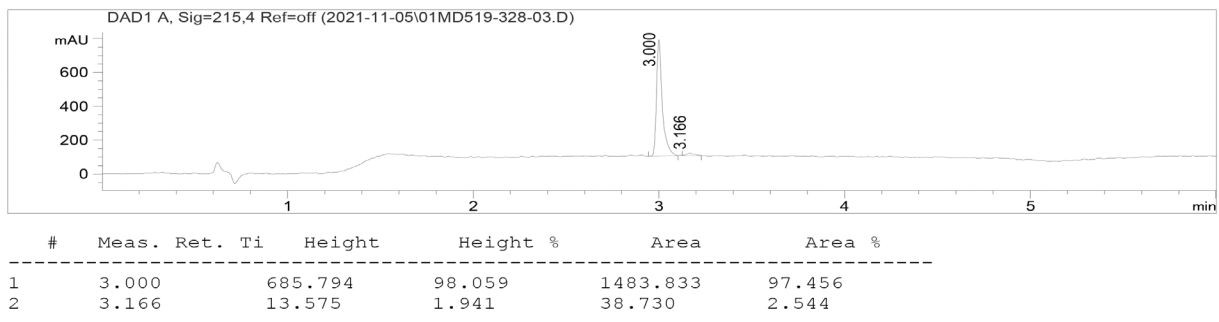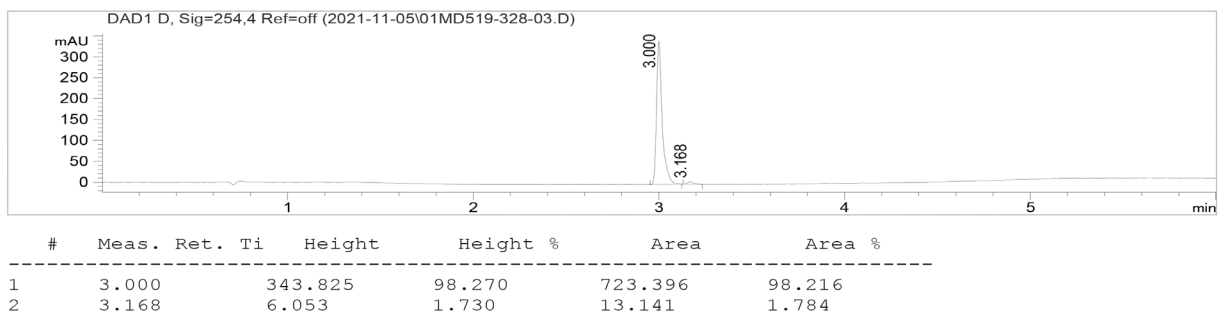

Figure S7. Summary and HPLC spectrum of CU-0905

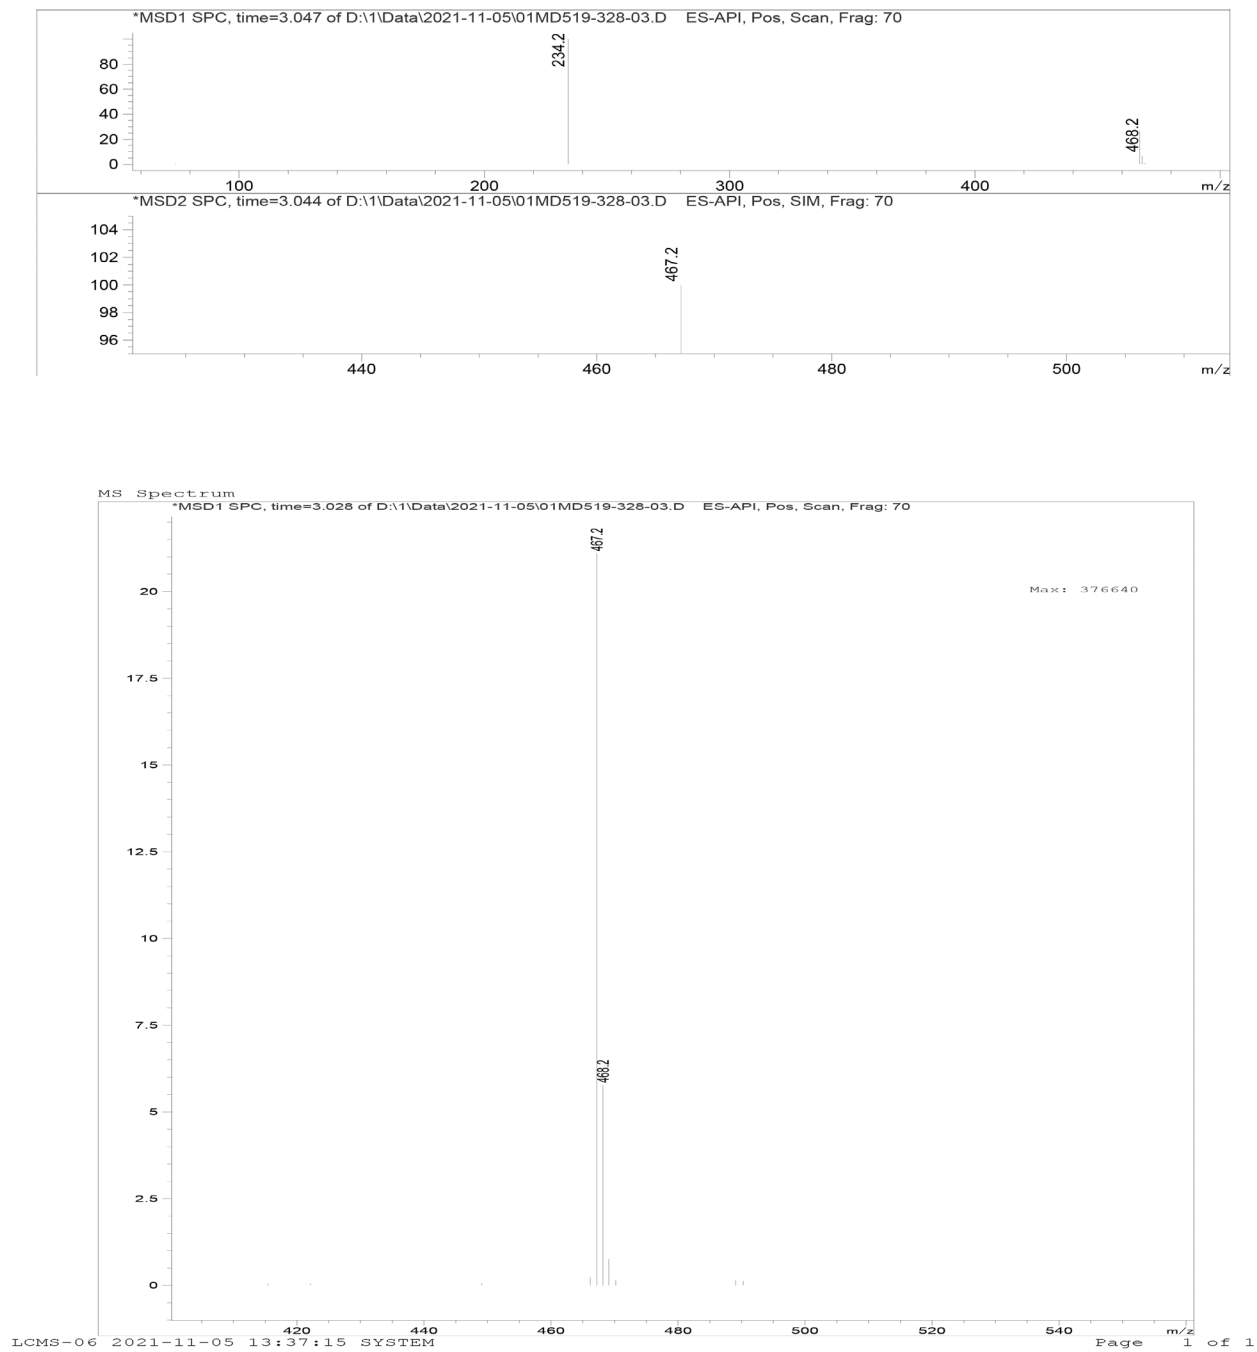

Figure S8. LC-MS analysis of CU-0905

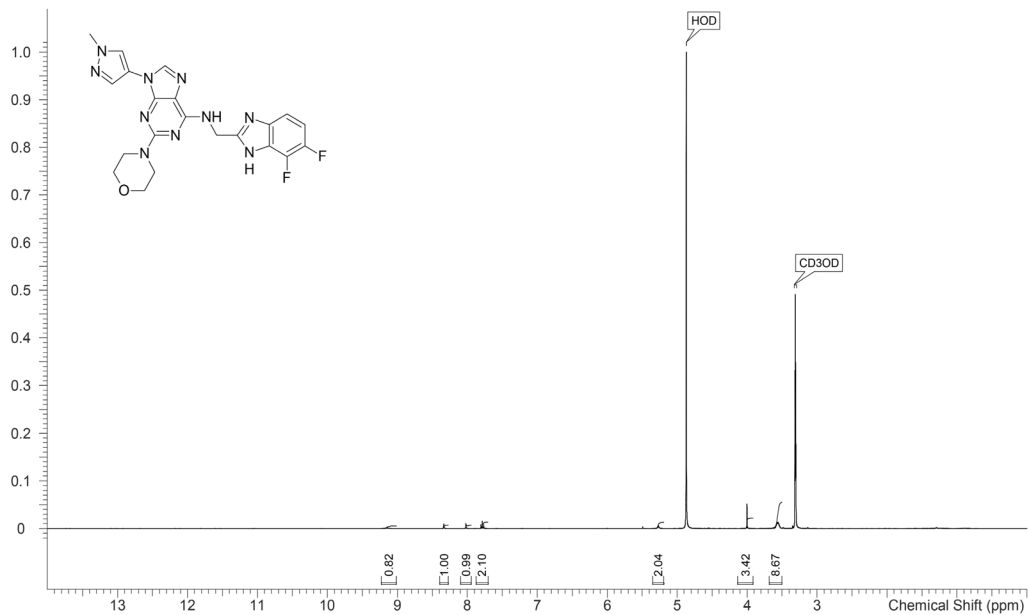

<sup>1</sup>H NMR (400 MHz, CD<sub>3</sub>OD) δ ppm 3.56 (br d, *J* = 5.4 Hz, 9 H), 4.00 (s, 3 H), 5.27 (br s, 2 H), 7.79 (t, *J* = 8.1 Hz, 2 H), 8.02 (s, 1 H), 8.34 (s, 1 H), 9.01 - 9.23 (m, 1 H).

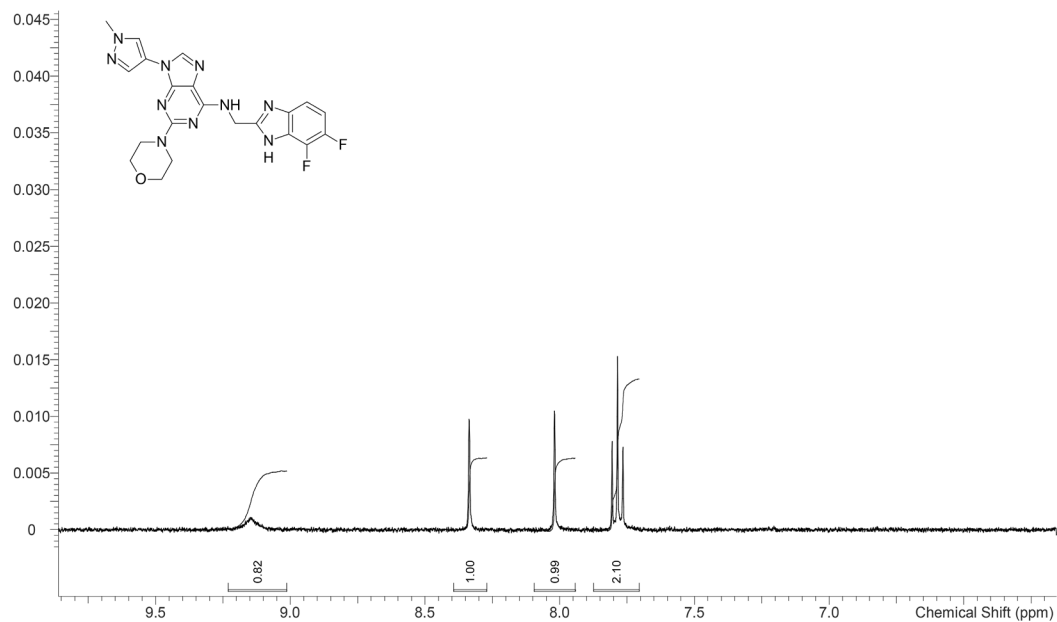

<sup>1</sup>H NMR (400 MHz, CD<sub>3</sub>OD) δ ppm 3.56 (br d, *J* = 5.4 Hz, 9 H), 4.00 (s, 3 H), 5.27 (br s, 2 H), 7.79 (t, *J* = 8.1 Hz, 2 H), 8.02 (s, 1 H), 8.34 (s, 1 H), 9.01 - 9.23 (m, 1 H).

Figure S9. <sup>1</sup>H NMR spectrum of CU-0905

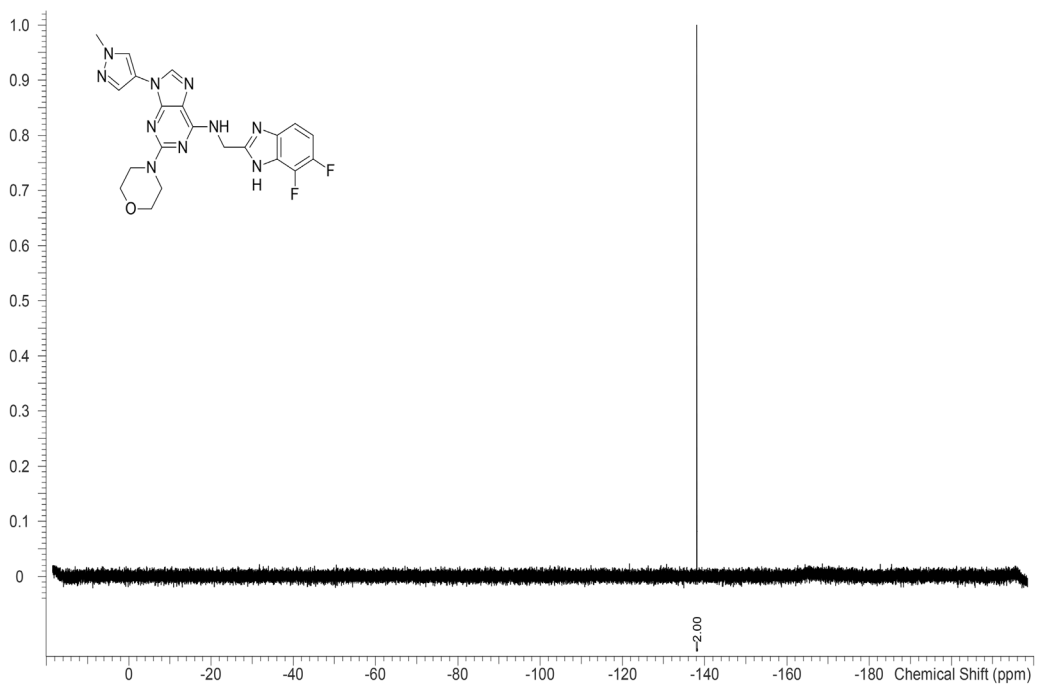

$^{19}\text{F}$  NMR (377 MHz,  $\text{CD}_3\text{OD}$ )  $\delta$  ppm -138.09 (s, 2 F).

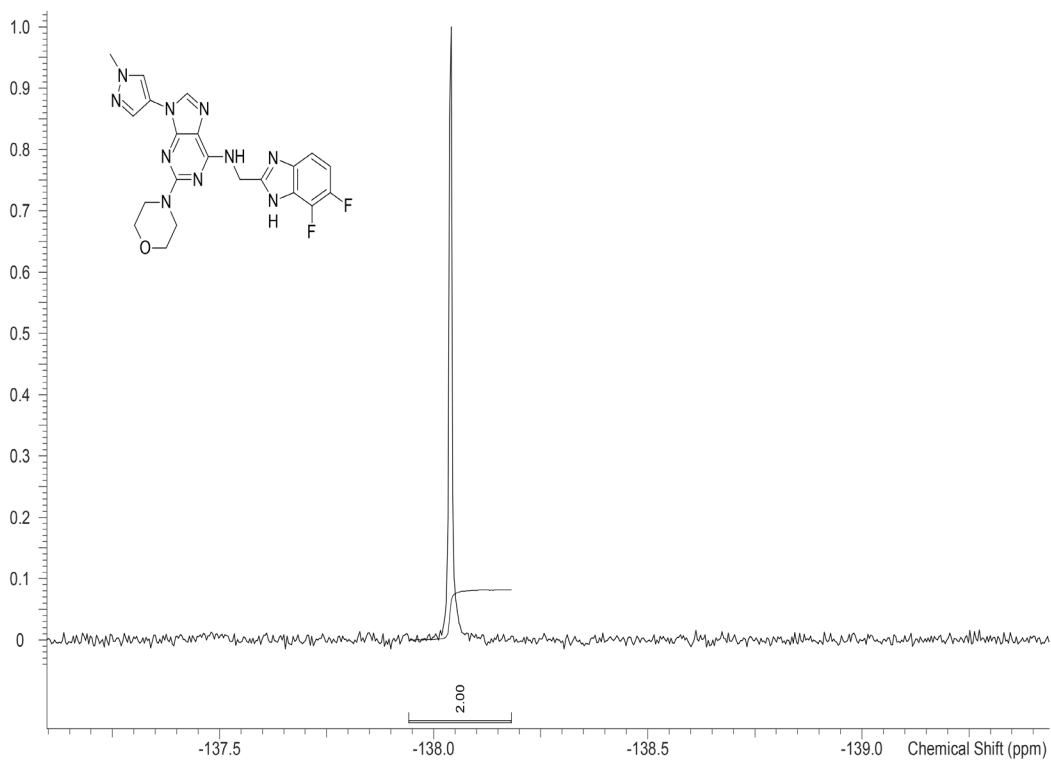

$^{19}\text{F}$  NMR (377 MHz,  $\text{CD}_3\text{OD}$ )  $\delta$  ppm -138.09 (s, 2 F).

Figure S10.  $^{19}\text{F}$  NMR spectrum of CU-0905

| Description      |                                                                  |
|------------------|------------------------------------------------------------------|
| Name             | Composé 3                                                        |
| OmegaChem #      | CU-0906                                                          |
| Lot #            | 01MD519-332-04                                                   |
| CAS #            | N/A                                                              |
| Chemical Formula | C <sub>22</sub> H <sub>23</sub> ClN <sub>10</sub> O <sub>2</sub> |
| Molecular Weight | 494.94                                                           |
| Campaign         | C0739-0906-01-21                                                 |

| Analysis           |                            |                                                   |
|--------------------|----------------------------|---------------------------------------------------|
| Tests              | Specifications             | Results                                           |
| Appearance         | White to pale-yellow solid | Pale-yellow solid                                 |
| Chemical Purity    | 95% minimum (HPLC)         | 98.4 % (HPLC, average $\lambda$ = 215 and 254 nm) |
| Mass Spectroscopy  | Must comply to Structure   | [M+H] <sup>+</sup> = 495.1                        |
| <sup>1</sup> H NMR | Must comply to Structure   | Conforms (Methanol-d <sub>4</sub> )               |

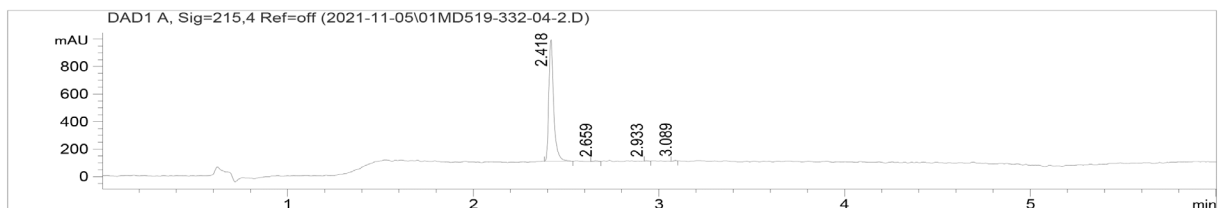

| # | Meas. Ret. Ti | Height  | Height % | Area     | Area % |
|---|---------------|---------|----------|----------|--------|
| 1 | 2.418         | 887.433 | 98.451   | 1594.864 | 98.675 |
| 2 | 2.659         | 6.537   | 0.725    | 13.117   | 0.812  |
| 3 | 2.933         | 3.392   | 0.376    | 3.997    | 0.247  |
| 4 | 3.089         | 4.037   | 0.448    | 4.304    | 0.266  |

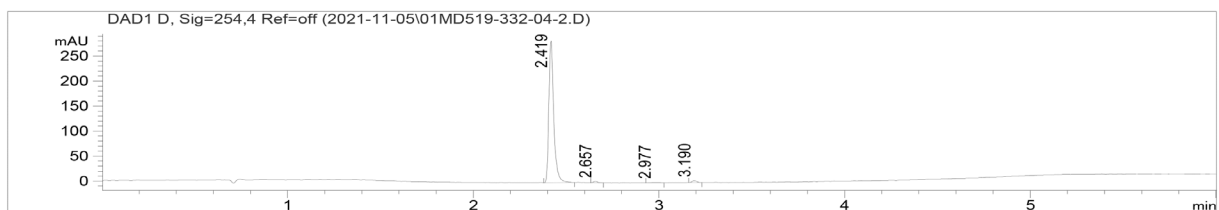

| # | Meas. Ret. Ti | Height  | Height % | Area    | Area % |
|---|---------------|---------|----------|---------|--------|
| 1 | 2.419         | 284.337 | 97.539   | 518.246 | 97.405 |
| 2 | 2.657         | 2.654   | 0.911    | 4.175   | 0.785  |
| 3 | 2.977         | 1.005   | 0.345    | 3.487   | 0.655  |
| 4 | 3.190         | 3.515   | 1.206    | 6.142   | 1.154  |

Figure S11. Summary and HPLC spectrum of CU-0906

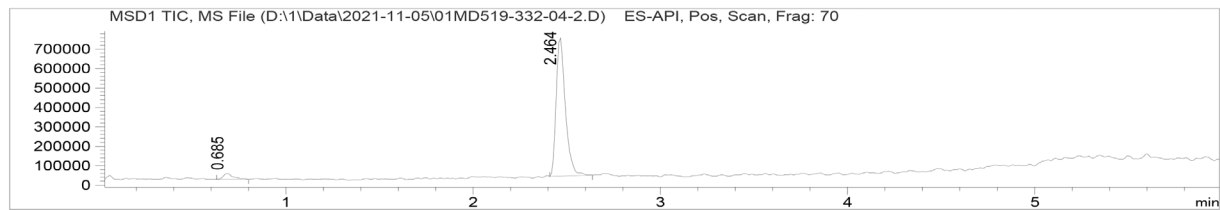

| # | Meas. Ret. Ti | Height     | Height % | Area        | Area % |
|---|---------------|------------|----------|-------------|--------|
| 1 | 0.685         | 30547.008  | 4.083    | 118031.805  | 4.614  |
| 2 | 2.464         | 717573.813 | 95.917   | 2440034.750 | 95.386 |

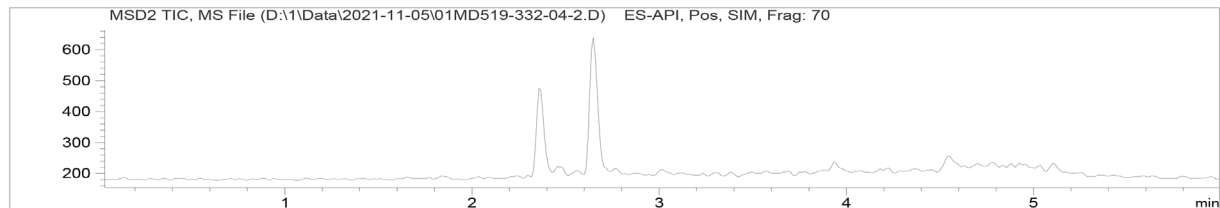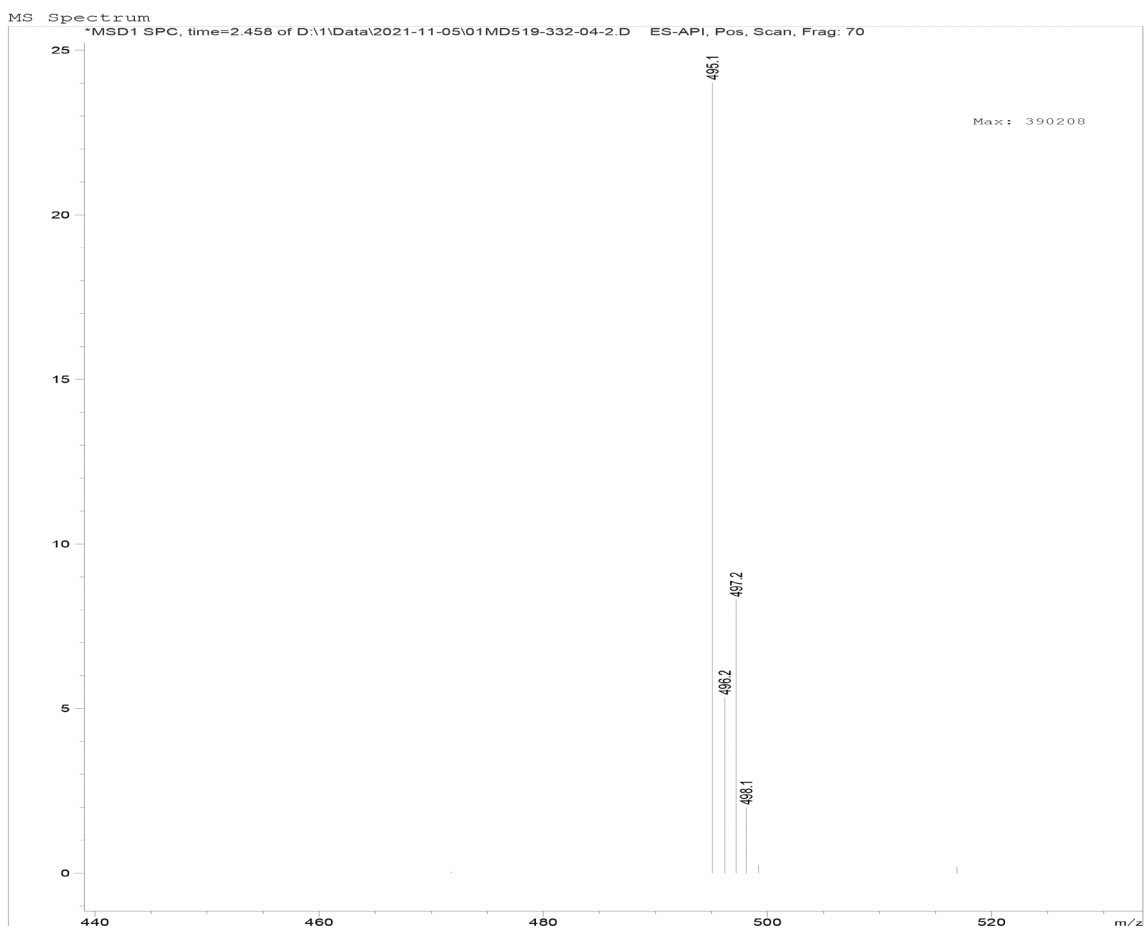

Figure S12. LC-MS analysis of CU-0906

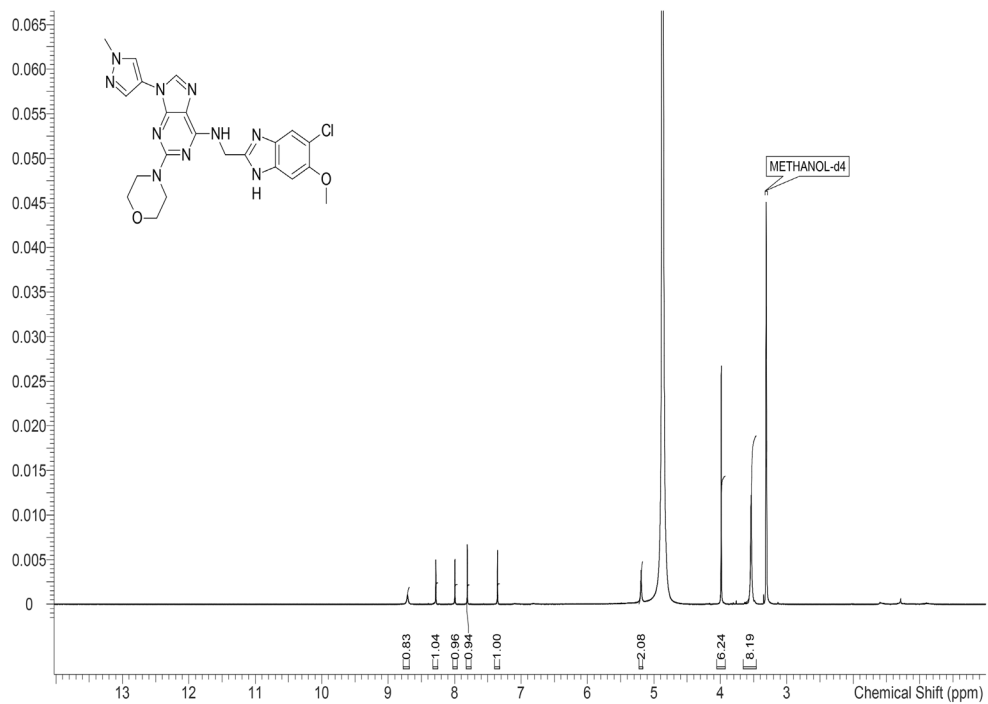

$^1\text{H}$  NMR (400 MHz,  $\text{CD}_3\text{OD}$ )  $\delta$  ppm 3.54 (br s, 8 H), 3.99 (s, 6 H), 5.19 (br s, 2 H), 7.36 (s, 1 H), 7.81 (s, 1 H), 8.00 (s, 1 H), 8.28 (s, 1 H), 8.71 (br s, 1 H).

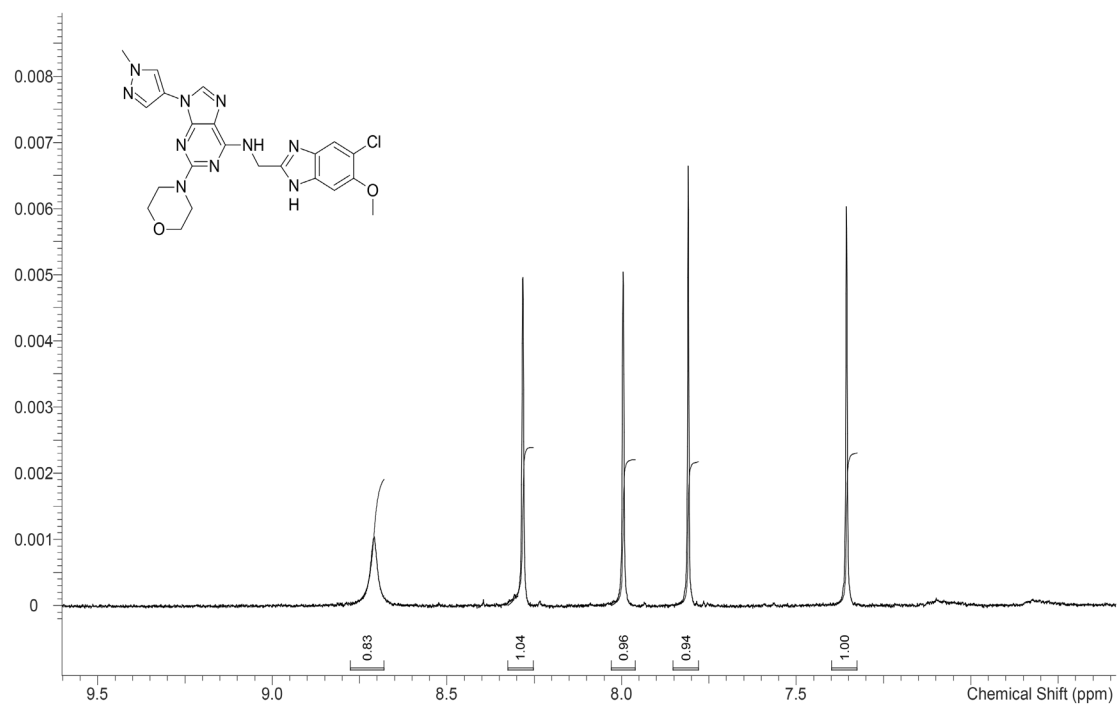

$^1\text{H}$  NMR (400 MHz,  $\text{CD}_3\text{OD}$ )  $\delta$  ppm 3.54 (br s, 8 H), 3.99 (s, 6 H), 5.19 (br s, 2 H), 7.36 (s, 1 H), 7.81 (s, 1 H), 8.00 (s, 1 H), 8.28 (s, 1 H), 8.71 (br s, 1 H).

Figure S13.  $^1\text{H}$  NMR spectrum of CU-0906
